# Supplementary material
Source: PubMed Central journal article supplement (PMC8892372)
Supplement: jamasurg-e220089-s001.pdf [file jamasurg-e220089-s001.pdf]

## Supplementary Online Content

Loggers SAI, Willems HC, Van Balen R, et al; FRAIL-HIP Study Group. Evaluation of quality of life after nonoperative or operative management of proximal femoral fractures in frail institutionalized patients: the FRAIL-HIP study. *JAMA Surg*. Published online March 2, 2022. doi:10.1001/jamasurg.2022.0089

**eTable 1.** EQ5D Utility and VAS Scores for Proxies and Caregiver

**eFigure 1.** EQ-5D Domains With the Levels of Problems per Domain and Point of Time in the Nonoperative and Operative Group

**eTable 2.** EQ5D Mobility Domain With Levels of Problems per Point of Time

**eTable 3.** EQ5D Self-Care Domain With Levels of Problems per Point of Time

**eTable 4.** EQ5D Activities of Daily Life Domain With Levels of Problems per Point of Time

**eTable 5.** EQ5D Pain/Discomfort Domain With Levels of Problems per Point of Time

**eTable 6.** EQ5D Activities of Daily Life Domain With Levels of Problems per Point of Time

**eTable 7.** Mobility Outcomes per Study Arm and Point of Time

**eFigure 2.** Quality of Life With Regards to the QUALIDEM Scores for the Nine Domains in the Nonoperative and Operative Group

**eTable 8.** Quality of Life With Regards to the QUALIDEM Scores for the Nine Domains

**eFigure 3.** Level of Pain and Morphine Administration During the Study Period in the Nonoperative and Operative Group

**eTable 9.** Pain Based on PACSLAC-D Scores per Point of Time

**eTable 10.** Morphine Administration per Point of Time

**eTable 11.** Cumulative Mortality Rates and Cause of Death

**eFigure 4.** Cox Proportional Hazard Survival Curve

**eTable 12.** Multivariable Analysis of Survival Risk

**eTable 13.** Treatment Satisfaction and Quality of Dying and Death

This supplementary material has been provided by the authors to give readers additional information about their work.

**eTable 1. EQ5D Utility and VAS Scores for Proxies and Caregiver**

|         |     | Nonoperative |                  |    |                  | Operative |                  |    |                  | P-value |           |
|---------|-----|--------------|------------------|----|------------------|-----------|------------------|----|------------------|---------|-----------|
| EQ5D    |     | N            | Proxy            | N  | Caregiver        | N         | Proxy            | N  | Caregiver        | Proxy   | Caregiver |
| Utility | W1  | 83           | 0.17 (0.11-0.23) | 86 | 0.13 (0.06-0.21) | 84        | 0.26 (0.20-0.33) | 84 | 0.21 (0.13-0.29) | <.001   | .002      |
|         | W2  | 20           | 0.19 (0.10-0.27) | 20 | 0.17 (0.07-0.28) | 65        | 0.28 (0.22-0.35) | 70 | 0.23 (0.15-0.32) |         |           |
|         | W4  | 14           | 0.24 (0.15-0.34) | 14 | 0.21 (0.09-0.33) | 58        | 0.34 (0.28-0.41) | 61 | 0.33 (0.25-0.42) |         |           |
|         | W12 | 7            | 0.27 (0.15-0.39) | 8  | 0.16 (0.02-0.30) | 47        | 0.40 (0.33-0.47) | 49 | 0.37 (0.28-0.45) |         |           |
|         | W24 | 5            | 0.20 (0.07-0.34) | 5  | 0.21 (0.05-0.36) | 41        | 0.39 (0.32-0.46) | 44 | 0.36 (0.27-0.45) |         |           |
| VAS     | W1  | 83           | 38 (32-43)       | 86 | 38 (33-42)       | 84        | 46 (41-52)       | 84 | 45 (40-50)       | .001    | <.001     |
|         | W2  | 20           | 33 (26-40)       | 20 | 40 (32-47)       | 65        | 48 (43-54)       | 70 | 50 (44-55)       |         |           |
|         | W4  | 14           | 33 (25-41)       | 14 | 39 (31-48)       | 58        | 50 (45-56)       | 61 | 53 (47-59)       |         |           |
|         | W12 | 7            | 40 (30-50)       | 8  | 46 (36-56)       | 47        | 51 (46-57)       | 49 | 54 (48-60)       |         |           |
|         | W24 | 5            | 33 (21-44)       | 5  | 43 (32-56)       | 41        | 53 (47-59)       | 44 | 55 (49-61)       |         |           |

Data are presented as mean (95% CI) with a p-value for the total effect of the mixed-effects regression model with regards to the effect of NOM and OM.

EQ5D, EuroQoL-5D-5L; VAS, visual analog scale; W, Week

**eFigure 1.** EQ-5D Domains With the Levels of Problems per Domain and Point of Time in the Nonoperative and Operative Group

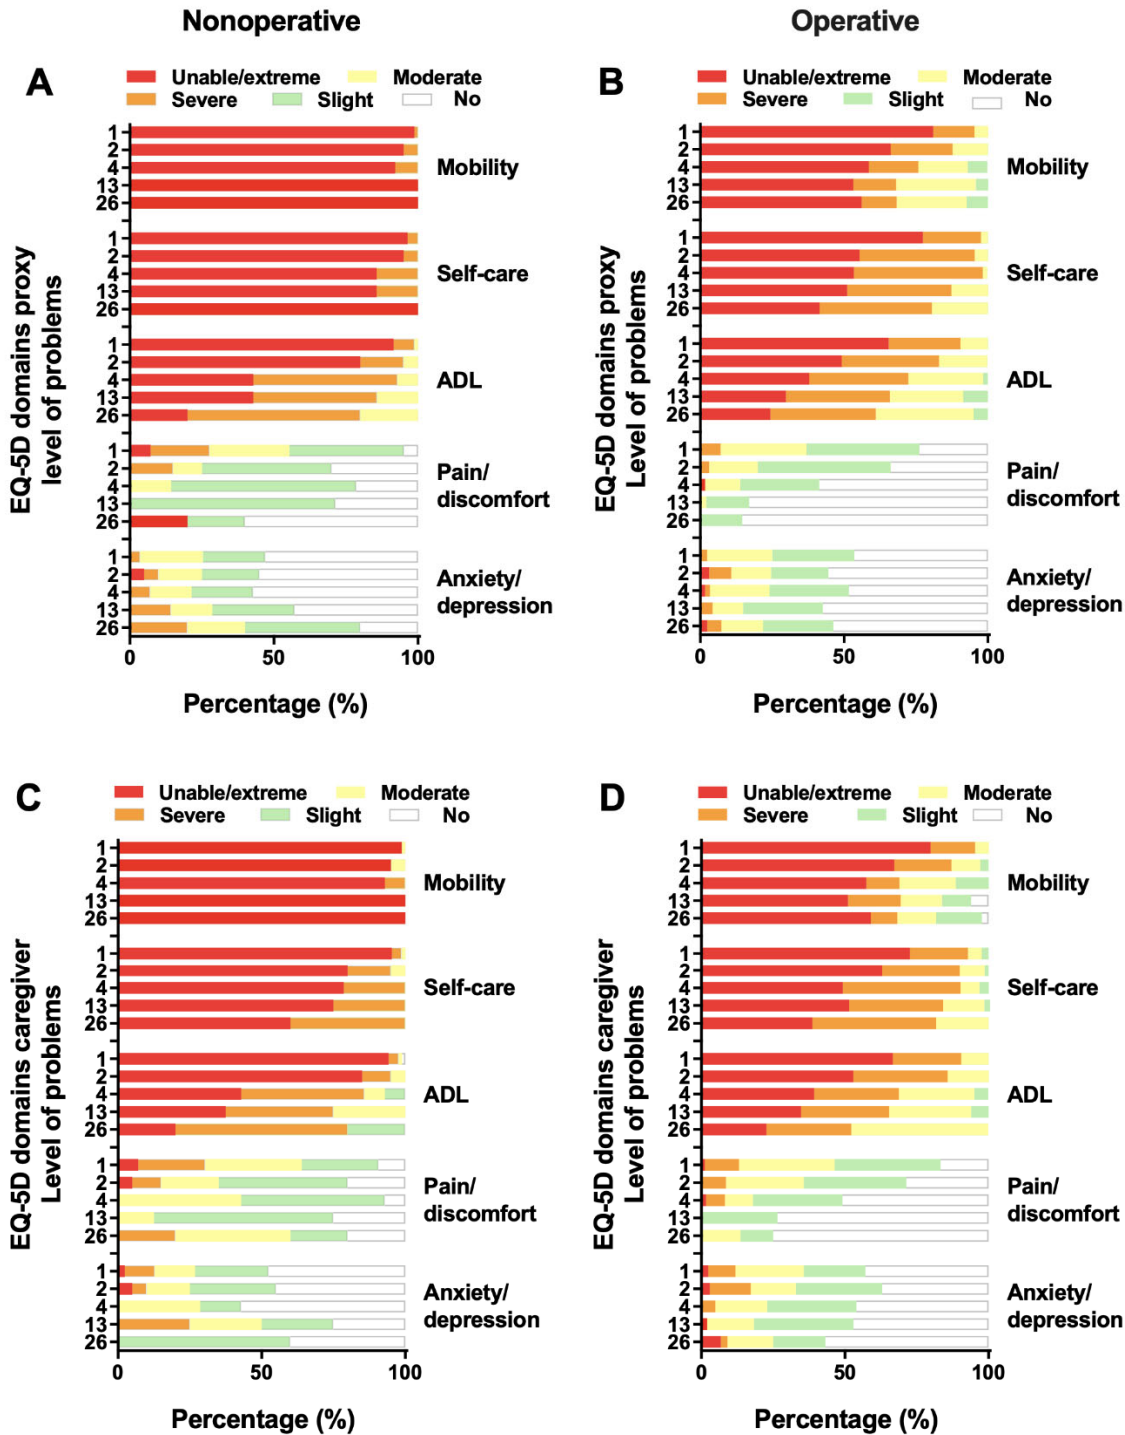

The data are presented as percentage of total of patients alive at the different follow-up moments. The number of patients for whom data were available are the same as in Figure 1 for the proxies and caregivers.

ADL, Activities of daily life.

**eTable 2.** EQ5D Mobility Domain With Levels of Problems per Point of Time

| EQ5D Mobility |             | Proxy    |          |       | Caregiver |          |       |
|---------------|-------------|----------|----------|-------|-----------|----------|-------|
|               |             | NOM      | OM       | p     | NOM       | OM       | p     |
| W1            | n=          | 83       | 84       |       | 86        | 84       |       |
|               | No problems | -        | -        | 0.001 | -         | -        | <.001 |
|               | Slight      | -        | -        |       | -         | -        |       |
|               | Moderate    | -        | 4 (5%)   |       | 1 (1%)    | 4 (5%)   |       |
|               | Severe      | 1 (1%)   | 12 (14%) |       | -         | 13 (16%) |       |
|               | Unable      | 82 (99%) | 68 (81%) |       | 85 (99%)  | 67 (80%) |       |
| W2            | n=          | 20       | 65       |       | 20        | 70       |       |
|               | No problems | -        | -        | 0.037 | -         | -        | .08   |
|               | Slight      | -        | -        |       | -         | 2 (3%)   |       |
|               | Moderate    | -        | 8 (12%)  |       | 1 (5%)    | 7 (10%)  |       |
|               | Severe      | 1 (5%)   | 14 (22%) |       | -         | 14 (20%) |       |
|               | Unable      | 19 (95%) | 43 (66%) |       | 19 (95%)  | 47 (67%) |       |
| W4            | n=          | 14       | 58       |       | 14        | 61       |       |
|               | No problems | -        | -        | 0.104 | -         | -        | .08   |
|               | Slight      | -        | 4 (7%)   |       | -         | 7 (12%)  |       |
|               | Moderate    | -        | 10 (17%) |       | -         | 12 (20%) |       |
|               | Severe      | 1 (7%)   | 10 (17%) |       | 1 (7%)    | 7 (12%)  |       |
|               | Unable      | 13 (92%) | 34 (59%) |       | 13 (93%)  | 35 (57%) |       |
| W12           | n=          | 7        | 47       |       | 8         | 49       |       |
|               | No problems | -        | -        | 0.137 | -         | 3 (6%)   | .15   |
|               | Slight      | -        | 2 (4%)   |       | -         | 5 (10%)  |       |
|               | Moderate    | -        | 13 (28%) |       | -         | 7 (14%)  |       |
|               | Severe      | -        | 7 (15%)  |       | -         | 9 (18%)  |       |
|               | Unable      | 7 (100%) | 25 (53%) |       | 8 (100%)  | 25 (51%) |       |
| W24           | n=          | 5        | 41       |       | 5         | 44       |       |
|               | No problems | -        | -        | 0.307 | -         | 1 (2%)   | .52   |
|               | Slight      | -        | 3 (7%)   |       | -         | 7 (16%)  |       |
|               | Moderate    | -        | 10 (24%) |       | -         | 6 (14%)  |       |
|               | Severe      | -        | 5 (12%)  |       | -         | 4 (9%)   |       |
|               | Unable      | 5 (100%) | 23 (56%) |       | 5 (100%)  | 26 (59%) |       |

The number are presented as percentage of total of patients alive at the particular point of time. EQ5D, EuroQoL-5D-5L; NOM, nonoperative management; OM, operative management; W, Week

**eTable 3. EQ5D Self-Care Domain With Levels of Problems per Point of Time**

| EQ5D Self-care |             | Proxy    |          |       | Caregiver |          |      |
|----------------|-------------|----------|----------|-------|-----------|----------|------|
|                |             | NOM      | OM       | p     | NOM       | OM       | p    |
| W1             | n=          | 83       | 84       |       | 86        | 84       |      |
|                | No problems | -        | -        | 0.001 | -         | -        | .001 |
|                | Slight      | -        | -        |       | -         | 2 (2%)   |      |
|                | Moderate    | -        | 2 (2%)   |       | 1 (1%)    | 4 (5%)   |      |
|                | Severe      | 3 (4%)   | 17 (20%) |       | 3 (4%)    | 17 (20%) |      |
|                | Unable      | 80 (96%) | 65 (77%) |       | 82 (95%)  | 61 (73%) |      |
| W2             | n=          | 20       | 65       |       | 20        | 70       |      |
|                | No problems | -        | -        | 0.005 | -         | -        | .54  |
|                | Slight      | -        | -        |       | -         | 1 (1%)   |      |
|                | Moderate    | -        | 3 (5%)   |       | 1 (5%)    | 6 (9%)   |      |
|                | Severe      | 1 (5%)   | 26 (40%) |       | 3 (15%)   | 19 (27%) |      |
|                | Unable      | 19 (95%) | 36 (55%) |       | 16 (80%)  | 44 (63%) |      |
| W4             | n=          | 14       | 58       |       | 14        | 61       |      |
|                | No problems | -        | -        | 0.086 | -         | -        | .23  |
|                | Slight      | -        | -        |       | -         | 2 (3%)   |      |
|                | Moderate    | -        | 1 (2%)   |       | -         | 4 (7%)   |      |
|                | Severe      | 2 (14%)  | 26 (45%) |       | 3 (21%)   | 25 (41%) |      |
|                | Unable      | 12 (86%) | 31 (53%) |       | 11 (79%)  | 30 (49%) |      |
| W12            | n=          | 7        | 47       |       | 8         | 49       |      |
|                | No problems | -        | -        | 0.214 | -         | -        | .54  |
|                | Slight      | -        | -        |       | -         | 1 (2%)   |      |
|                | Moderate    | -        | 6 (13%)  |       | -         | 7 (14%)  |      |
|                | Severe      | 1 (14%)  | 17 (36%) |       | 2 (25%)   | 16 (33%) |      |
|                | Unable      | 6 (86%)  | 24 (51%) |       | 6 (75%)   | 25 (51%) |      |
| W24            | n=          | 5        | 41       |       | 5         | 44       |      |
|                | No problems | -        | -        | 0.047 | -         | -        | .49  |
|                | Slight      | -        | -        |       | -         | -        |      |
|                | Moderate    | -        | 8 (20%)  |       | -         | 8 (18%)  |      |
|                | Severe      | -        | 16 (39%) |       | 2 (40%)   | 19 (43%) |      |
|                | Unable      | 5 (100%) | 17 (42%) |       | 3 (60%)   | 17 (39%) |      |

The number are presented as percentage of total of patients alive at the particular point of time. EQ5D, EuroQoL-5D-5L; NOM, nonoperative management; OM, operative management; W, Week

**eTable 4. EQ5D Activities of Daily Life Domain With Levels of Problems per Point of Time**

| EQ5D                     |             | Proxy    |          |        | Caregiver |          |       |
|--------------------------|-------------|----------|----------|--------|-----------|----------|-------|
| Activities of daily life |             | NOM      | OM       | p      | NOM       | OM       | p     |
| W1                       | n=          | 83       | 84       |        | 86        | 84       |       |
|                          | No problems | -        | -        | <0.001 | 1 (1%)    | -        | <.001 |
|                          | Slight      | -        | -        |        | -         | -        |       |
|                          | Moderate    | 1 (1%)   | 8 (10%)  |        | 1 (1%)    | 10%      |       |
|                          | Severe      | 6 (7%)   | 21 (25%) |        | 3 (4%)    | 24%      |       |
|                          | Unable      | 76 (92%) | 55 (66%) |        | 81 (94%)  | 67%      |       |
| W2                       | n=          | 20       | 65       |        | 20        | 70       |       |
|                          | No problems | -        | -        | 0.051  | -         | -        | .04   |
|                          | Slight      | -        | -        |        | -         | -        |       |
|                          | Moderate    | 1 (5%)   | 11 (17%) |        | 1 (5%)    | 10 (14%) |       |
|                          | Severe      | 3 (1%)   | 22 (34%) |        | 2 (10%)   | 23 (33%) |       |
|                          | Unable      | 16 (80%) | 32 (49%) |        | 17 (85%)  | 37 (53%) |       |
| W4                       | n=          | 14       | 58       |        | 14        | 61       |       |
|                          | No problems | -        | -        | 0.421  | -         | -        | .46   |
|                          | Slight      | -        | 1 (2%)   |        | 1 (7%)    | 3 (5%)   |       |
|                          | Moderate    | 1 (7%)   | 15 (25%) |        | 1 (7%)    | 16 (26%) |       |
|                          | Severe      | 7 (50%)  | 20 (35%) |        | 6 (43%)   | 18 (30%) |       |
|                          | Unable      | 6 (43%)  | 22 (38%) |        | 6 (43%)   | 24 (39%) |       |
| W12                      | n=          | 7        | 47       |        | 8         | 49       |       |
|                          | No problems | -        | -        | 0.724  | -         | -        | .89   |
|                          | Slight      | -        | 4 (9%)   |        | -         | 3 (6%)   |       |
|                          | Moderate    | 1 (14%)  | 12 (26%) |        | 2 (25%)   | 14 (29%) |       |
|                          | Severe      | 3 (43%)  | 17 (36%) |        | 3 (38%)   | 15 (31%) |       |
|                          | Unable      | 3 (43%)  | 14 (30%) |        | 3 (38%)   | 17 (35%) |       |
| W24                      | n=          | 5        | 41       |        | 5         | 44       |       |
|                          | No problems | -        | -        | 0.758  | -         | -        | .006  |
|                          | Slight      | -        | 2 (5%)   |        | 1 (20%)   | -        |       |
|                          | Moderate    | 1 (20%)  | 14 (34%) |        | -         | 21 (48%) |       |
|                          | Severe      | 3 (60%)  | 15 (37%) |        | 3 (60%)   | 13 (30%) |       |
|                          | Unable      | 1 (20%)  | 10 (24%) |        | 1 (20%)   | 10 (23%) |       |

The number are presented as percentage of total of patients alive at the particular point of time. EQ5D, EuroQoL-5D-5L; NOM, nonoperative management; OM, operative management; W, Week



**eTable 5. EQ5D Pain/Discomfort Domain With Levels of Problems per Point of Time**

| EQ5D Pain/discomfort |          | Proxy    |          |        | Caregiver |          |      |
|----------------------|----------|----------|----------|--------|-----------|----------|------|
|                      |          | NOM      | OM       | p      | NOM       | OM       | p    |
| W1                   | n=       | 83       | 84       |        | 86        | 84       |      |
|                      | No       | 4 (5%)   | 20 (24%) | <0.001 | 8 (9%)    | 14 (17%) | .05  |
|                      | Slight   | 33 (40%) | 33 (39%) |        | 23 (27%)  | 31 (37%) |      |
|                      | Moderate | 23 (28%) | 25 (30%) |        | 29 (34%)  | 28 (33%) |      |
|                      | Severe   | 17 (21%) | 6 (7%)   |        | 20 (23%)  | 10 (12%) |      |
|                      | Extreme  | 6 (7%)   | -        |        | 6 (7%)    | 1 (1%)   |      |
| W2                   | n=       | 20       | 65       |        | 20        | 70       |      |
|                      | No       | 6 (30%)  | 22 (34%) | 0.236  | 4 (20%)   | 20 (29%) | .33  |
|                      | Slight   | 9 (45%)  | 30 (46%) |        | 9 (45%)   | 25 (36%) |      |
|                      | Moderate | 2 (10%)  | 11 (17%) |        | 4 (20%)   | 19 (27%) |      |
|                      | Severe   | 3 (15%)  | 2 (3%)   |        | 2 (10%)   | 6 (9%)   |      |
|                      | Extreme  | -        | -        |        | 1 (5%)    | -        |      |
| W4                   | n=       | 14       | 58       |        | 14        | 61       |      |
|                      | No       | 3 (21%)  | 34 (59%) | 0.053  | 1 (7%)    | 31 (51%) | .004 |
|                      | Slight   | 9 (64%)  | 16 (28%) |        | 7 (50%)   | 19 (31%) |      |
|                      | Moderate | 2 (14%)  | 7 (12%)  |        | 6 (43%)   | 6 (10%)  |      |
|                      | Severe   | -        | -        |        | -         | 4 (7%)   |      |
|                      | Extreme  | -        | 1 (2%)   |        | -         | 1 (2%)   |      |
| W12                  | n=       | 7        | 47       |        | 8         | 49       |      |
|                      | No       | 2 (29%)  | 39 (83%) | 0.004  | 2 (25%)   | 36 (74%) | .003 |
|                      | Slight   | 5 (71%)  | 7 (15%)  |        | 5 (63%)   | 13 (27%) |      |
|                      | Moderate | -        | 1 (2%)   |        | 1 (13%)   | -        |      |
|                      | Severe   | -        | -        |        | -         | -        |      |
|                      | Extreme  | -        | -        |        | -         | -        |      |
| W24                  | n=       | 5        | 41       |        | 5         | 44       |      |
|                      | No       | 3 (60%)  | 35 (85%) | 0.013  | 1 (20%)   | 33 (75%) | .005 |
|                      | Slight   | 1 (20%)  | 6 (15%)  |        | 1 (20%)   | 5 (11%)  |      |
|                      | Moderate | -        | -        |        | 2 (40%)   | 6 (14%)  |      |
|                      | Severe   | -        | -        |        | 1 (20%)   | -        |      |
|                      | Extreme  | 1 (20%)  | -        |        | -         | -        |      |

The number are presented as percentage of total of patients alive at the particular point of time. EQ5D, EuroQoL-5D-5L; NOM, nonoperative management; OM, operative management; W, Week

**eTable 6. EQ5D Activities of Daily Life Domain With Levels of Problems per Point of Time**

| EQ5D<br>Anxiety/depression |          | Proxy    |          |       | Caregiver |          |      |
|----------------------------|----------|----------|----------|-------|-----------|----------|------|
|                            |          | NOM      | OM       | p     | NOM       | OM       | p    |
| W1                         | n=       | 83       | 84       |       | 86        | 84       |      |
|                            | No       | 44 (53%) | 39 (46%) | 0.710 | 41 (48%)  | 36 (43%) | .60  |
|                            | Slight   | 18 (22%) | 24 (29%) |       | 22 (26%)  | 18 (21%) |      |
|                            | Moderate | 18 (22%) | 19 (23%) |       | 12 (14%)  | 20 (24%) |      |
|                            | Severe   | 3 (4%)   | 2 (2%)   |       | 9 (11%)   | 8 (10%)  |      |
|                            | Extreme  | -        | -        |       | 2 (2%)    | 2 (2%)   |      |
| W2                         | n=       | 20       | 65       |       | 20        | 70       |      |
|                            | No       | 11 (55%) | 36 (55%) | 0.988 | 9 (45%)   | 26 (37%) | .82  |
|                            | Slight   | 4 (20%)  | 13 (20%) |       | 6 (30%)   | 21 (30%) |      |
|                            | Moderate | 3 (15%)  | 9 (14%)  |       | 3 (15%)   | 11 (16%) |      |
|                            | Severe   | 1 (5%)   | 5 (8%)   |       | 1 (5%)    | 10 (14%) |      |
|                            | Extreme  | 1 (5%)   | 2 (3%)   |       | 1 (5%)    | 2 (3%)   |      |
| W4                         | n=       | 14       | 58       |       | 14        | 61       |      |
|                            | No       | 8 (57%)  | 28 (48%) | 0.734 | 8 (57%)   | 28 (46%) | .43  |
|                            | Slight   | 3 (21%)  | 16 (28%) |       | 2 (14%)   | 19 (31%) |      |
|                            | Moderate | 2 (14%)  | 12 (21%) |       | 4 (29%)   | 11 (18%) |      |
|                            | Severe   | 1 (7%)   | 1 (2%)   |       | -         | 3 (5%)   |      |
|                            | Extreme  | -        | 1 (2%)   |       | -         | -        |      |
| W12                        | n=       | 7        | 47       |       | 8         | 49       |      |
|                            | No       | 3 (43%)  | 27 (57%) | 0.703 | 2 (25%)   | 23 (47%) | .008 |
|                            | Slight   | 2 (29%)  | 13 (28%) |       | 2 (25%)   | 17 (35%) |      |
|                            | Moderate | 1 (14%)  | 5 (11%)  |       | 2 (25%)   | 8 (16%)  |      |
|                            | Severe   | 1 (14%)  | 2 (4%)   |       | 2 (25%)   | -        |      |
|                            | Extreme  | -        | -        |       | -         | 1 (2%)   |      |
| W24                        | n=       | 5        | 41       |       | 5         | 44       |      |
|                            | No       | 1 (20%)  | 22 (54%) | 0.526 | 3 (40%)   | 25 (58%) | .29  |
|                            | Slight   | 2 (40%)  | 10 (24%) |       | 3 (60%)   | 8 (18%)  |      |
|                            | Moderate | 1 (20%)  | 6 (15%)  |       | -         | 7 (16%)  |      |
|                            | Severe   | 1 (20%)  | 2 (5%)   |       | -         | 1 (2%)   |      |
|                            | Extreme  | -        | 1 (2%)   |       | -         | 3 (7%)   |      |

The number are presented as percentage of total of patients alive at the particular point of time.

EQ5D, EuroQoL-5D-5L; NOM, nonoperative management; OM, operative management; W, Week

**eTable 7. Mobility Outcomes per Study Arm and Point of Time**

| <b>Nonoperative (N=88)</b>                                   |                            |                  |                         |                   |               |
|--------------------------------------------------------------|----------------------------|------------------|-------------------------|-------------------|---------------|
|                                                              | <b>n=</b>                  | <b>Bed-bound</b> | <b>Bed- chair</b>       | <b>Few steps*</b> | <b>Mobile</b> |
| Baseline                                                     | 88                         | -                | 15 (17%)                | 24 (14%)          | 57 (65%)      |
| W1                                                           | 88                         | 79 (90%)         | 8 (9%)                  | -                 | 1 (1%)        |
| W2                                                           | 24                         | 12 (50%)         | 11 (46%)                | -                 | 1 (4%)        |
| W4                                                           | 16                         | 2 (18%)          | 9 (82%)                 | -                 | -             |
| W12                                                          | 11                         | 2 (18%)          | 9 (82%)                 | -                 | -             |
| W24                                                          | 8                          | 1 (13%)          | 7 (88%)                 | -                 | -             |
| <b>Operative (N=84)</b>                                      |                            |                  |                         |                   |               |
|                                                              | <b>n=</b>                  | <b>Bed-bound</b> | <b>Bed-chair</b>        | <b>Few steps*</b> | <b>Mobile</b> |
| Baseline                                                     | 84                         | -                | 10 (12%)                | 8 (10%)           | 66 (79%)      |
| W1                                                           | 84                         | 16 (19%)         | 50 (60%)                | 15 (17%)          | 4 (5%)        |
| W2                                                           | 73                         | 8 (11%)          | 44 (60%)                | 10 (14%)          | 11 (15%)      |
| W4                                                           | 70                         | 6 (9%)           | 39 (56%)                | 8 (11%)           | 17 (24%)      |
| W12                                                          | 57                         | 1 (2%)           | 31 (54%)                | 6 (11%)           | 19 (33%)      |
| W24                                                          | 48                         | -                | 28 (58%)                | 2 (4%)            | 18 (38%)      |
| <b>Maximum mobility at last follow-up visit (% of total)</b> |                            |                  |                         |                   |               |
|                                                              | <b>Nonoperative (N=88)</b> |                  | <b>Operative (N=84)</b> |                   | <b>p</b>      |
| Bed-bound                                                    | 78 (89%)                   |                  | 15 (18%)                |                   | <.001         |
| Bed-chair                                                    | 10 (11%)                   |                  | 45 (54%)                |                   |               |
| Few steps*                                                   | -                          |                  | 5 (6%)                  |                   |               |
| Mobile                                                       | -                          |                  | 19 (22%)                |                   |               |

Data are presented as number (% of total still alive) or number (% of total)

\* Few steps; few steps possible with an action radius of <10 meters

FU, Follow-up; W, Week

**eFigure 2.** Quality of Life With Regards to the QUALIDEM Scores for the Nine Domains in the Nonoperative and Operative Group

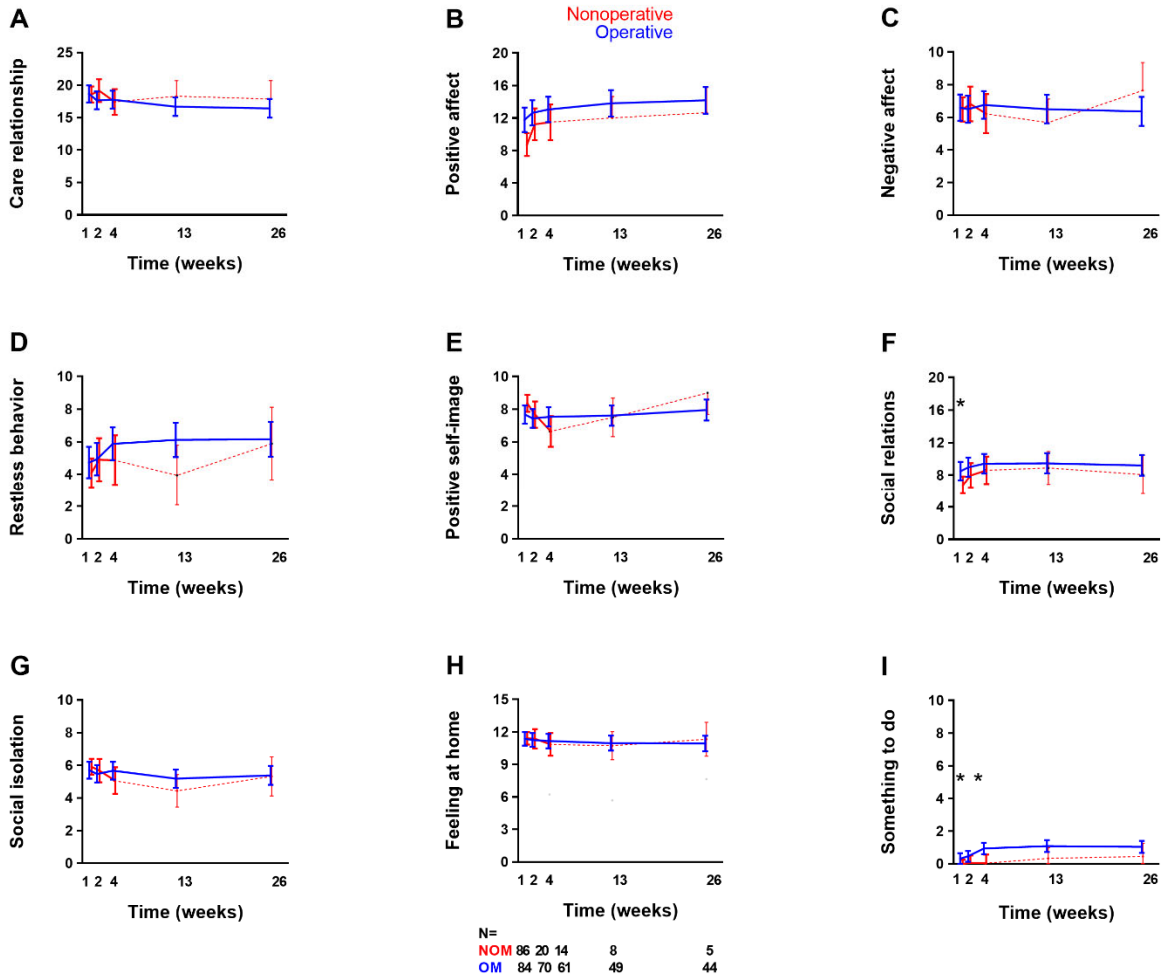

Data are presented as mean (95% CI). The table displays the number of patients featuring with a measurement at the different points of time. The numbers below the figure indicate the number of patients for whom EQ-5D scores could be determined at the different follow up moment. The dotted line represents unadjusted measurements featuring less than 10 patients. Note that there are varying maximum scores per domain.

\*statistical difference (p<0.05).

*NOM, nonoperative management; OM, operative management*

**eTable 8.** Quality of Life With Regards to the QUALIDEM Scores for the Nine Domains

|     | NOM                                  | OM         | p   | NOM                              | OM         | p     | NOM                                 | OM       | p     |
|-----|--------------------------------------|------------|-----|----------------------------------|------------|-------|-------------------------------------|----------|-------|
|     | <b>Care relationship (0-21)</b>      |            |     | <b>Positive affect (0-18)</b>    |            |       | <b>Negative affect (0-9)</b>        |          |       |
| W1  | 19 (17-20)                           | 19 (17-20) | .22 | 9 (7-10)                         | 12 (10-13) | 0.001 | 6 (6-7)                             | 7 (6-7)  | .94   |
| W2  | 19 (17-21)                           | 18 (16-19) |     | 11 (9-13)                        | 13 (11-14) |       | 7 (6-8)                             | 6 (6-7)  |       |
| W4  | 17 (15-19)                           | 18 (16-19) |     | 11 (9-14)                        | 13 (11-15) |       | 6 (5-7)                             | 7 (6-8)  |       |
| W12 | 18 (16-21)                           | 17 (15-18) |     | 12 (9-15)                        | 14 (12-15) |       | 6 (4-7)                             | 6 (6-7)  |       |
| W24 | 18 (15-21)                           | 16-(15-18) |     | 13 (10-16)                       | 14 (13-16) |       | 8 (6-9)                             | 6 (5-7)  |       |
|     | <b>Restless tense behavior (0-9)</b> |            |     | <b>Positive self-image (0-9)</b> |            |       | <b>Social relations (0-18)</b>      |          |       |
| W1  | 4 (3-5)                              | 5 (4-6)    | .09 | 8 (7-8)                          | 8 (8-9)    | .45   | 7 (7-10)                            | 8 (7-10) | .07   |
| W2  | 5 (4-6)                              | 5 (4-6)    |     | 7 (7-8)                          | 8 (7-8)    |       | 8 (8-10)                            | 9 (8-10) |       |
| W4  | 5 (3-6)                              | 6 (5-7)    |     | 8 (7-8)                          | 7 (6-8)    |       | 9 (8-11)                            | 9 (8-11) |       |
| W12 | 4 (2-6)                              | 6 (5-7)    |     | 8 (7-8)                          | 7 (6-9)    |       | 9 (8-11)                            | 9 (8-11) |       |
| W24 | 6 (4-8)                              | 6 (5-7)    |     | 8 (7-9)                          | 9 (8-9)    |       | 8 (8-10)                            | 9 (8-10) |       |
|     | <b>Social isolation (0-9)</b>        |            |     | <b>Feeling at home (0-12)</b>    |            |       | <b>Having something to do (0-6)</b> |          |       |
| W1  | 6 (5-6)                              | 6 (5-6)    | .44 | 11 (11-12)                       | 11 (11-12) | >.99  | 0 (0-0)                             | 0 (0-1)  | <.001 |
| W2  | 6 (5-6)                              | 5 (5-6)    |     | 11 (10-12)                       | 11 (11-12) |       | 0 (0-1)                             | 0 (0-1)  |       |
| W4  | 5 (4-6)                              | 6 (5-6)    |     | 11 (10-12)                       | 11 (10-12) |       | 0 (0-1)                             | 1 (1-1)  |       |
| W12 | 4 (3-5)                              | 5 (5-6)    |     | 11 (9-12)                        | 11 (10-12) |       | 0 (0-1)                             | 1 (1-1)  |       |
| W24 | 5 (4-7)                              | 5 (5-6)    |     | 11 (11-13)                       | 11 (10-12) |       | 0 (0-1)                             | 1 (1-1)  |       |

Data are presented as mean (95% CI) with a p-value for the total effect of the mixed-effects regression model with regards to the effect of NOM and OM. QUALIDEM score: higher scores indicate a better quality of life.

Nonoperative responses per FU stage: W1=86, W2= 20, W4= 14, W12= 8, W24= 5

Operative responses per FU stage: W1=84, W2= 70, W4= 61, W12= 49, W24= 44

NOM, nonoperative management; OM, operative management; W, week; FU, Follow-up

**eFigure 3.** Level of Pain and Morphine Administration During the Study Period in the Nonoperative and Operative Group

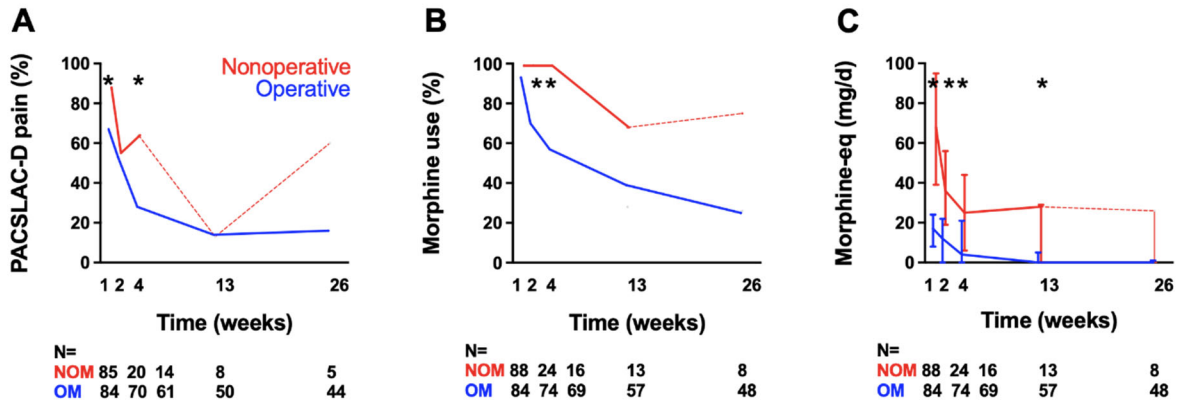

Data are presented as percentages of patients still alive or median (P<sub>25</sub>-P<sub>75</sub>). The dotted line represents measurements with less than 10 patients, in which case no statistical calculations were performed. The table displays the number of patients featuring with a measurement at the different points of time.

\*statistical difference (p<0.05).

Morphine-eq (mg/d), Oral morphine equivalent of 1 mg per day; NOM, nonoperative management; OM, operative management.

**eTable 9.** Pain Based on PACSLAC-D Scores per Point of Time

| PACSLAC-D | Nonoperative |             |           | Operative |           |           | P-value      |              |
|-----------|--------------|-------------|-----------|-----------|-----------|-----------|--------------|--------------|
|           | n            | Median<br>n | ≥4 (pain) | n         | Median    | ≥4 (pain) | Median<br>an | ≥4<br>(pain) |
| W1        | 85           | 6 (4-9)     | 75 (88%)  | 84        | 4.5 (2-8) | 56 (67%)  | .01          | .001         |
| W2        | 20           | 4 (1-6)     | 11 (55%)  | 70        | 4 (0-6)   | 37 (53%)  | .76          | >.99         |
| W4        | 14           | 4 (1-5)     | 9 (64%)   | 61        | 0 (0-5)   | 17 (28%)  | .01          | .14          |
| W12       | 8            | 0 (0-2)     | 1 (13%)   | 50        | 0 (0-0)   | 7 (14%)   | .46          | .70          |
| W24       | 5            | 5 (0-7)     | 3 (60%)   | 44        | 0 (0-1)   | 7 (16%)   | .09          | .05          |

Data are presented as median (P<sub>25</sub>-P<sub>75</sub>) or as n (%)

**eTable 10.** Morphine Administration per Point of Time

| Morphine use | Nonoperative |           |            | Operative |          |           | P-value |          |
|--------------|--------------|-----------|------------|-----------|----------|-----------|---------|----------|
|              | n            | n (%)     | Daily MG   | n         | n (%)    | Daily MG  | n (%)   | Daily MG |
| W1           | 88           | 87 (99%)  | 68 (39-95) | 84        | 78 (93%) | 17 (8-24) | .06     | <.001    |
| W2           | 24           | 23 (99%)  | 36 (19-56) | 74        | 52 (70%) | 12 (0-22) | .01     | <.001    |
| W4           | 16           | 15 (99%)  | 25 (6-44)  | 69        | 39 (57%) | 4 (0-22)  | .008    | <.001    |
| W12          | 13           | 9 (68%)   | 28 (0-29)  | 57        | 22 (39%) | 4 (0-21)  | .06     | .002     |
| W24          | 8            | 6 (75%)   | 26 (0-31)  | 48        | 12 (25%) | 0 (0-5)   | .01     | .004     |
| Total        | 88           | 88 (100%) | 68 (38-95) | 84        | 83 (99%) | 6 (1-26)  | .49     | <.001    |

Data are presented as median (P<sub>25</sub>-P<sub>75</sub>) or as n (%)

Daily MG, Daily equivalent amount of 1 milligram of oral morphine per day



**eTable 11. Cumulative Mortality Rates and Cause of Death**

| <b>Characteristic</b>         |                       | <b>Nonoperative<br/>N=88</b> | <b>Operative<br/>N=84</b> |
|-------------------------------|-----------------------|------------------------------|---------------------------|
| <b>Mortality (% of total)</b> | In hospital           | 4 (4.5%)                     | 3 (4%)                    |
|                               | 1 week                | 44 (50%)                     | 3 (4%)                    |
|                               | 2 weeks               | 66 (75%)                     | 11 (13%)                  |
|                               | 30-day                | 73 (83%)                     | 21 (25%)                  |
|                               | 3 months              | 80 (91%)                     | 34 (40%)                  |
|                               | 6 months              | 83 (94%)                     | 40 (48%)                  |
|                               | Time to death         | 7 (5-12)                     | 29 (12-62)                |
|                               | <b>Cause of death</b> |                              | <b>N=83</b>               |
|                               | Dehydration /cachexia | 59 (71%)                     | 15 (38%)                  |
|                               | Pneumonia             | 9 (11%)                      | 9 (23%)                   |
|                               | Heart failure         | 5 (6%)                       | 3 (8%)                    |
|                               | Surgery related       | -                            | 4 (10%)                   |
|                               | Urosepsis             | 2 (2%)                       | -                         |
|                               | Sepsis                | 1 (1%)                       | 1 (3%)                    |
|                               | Other                 | 1 (1%)                       | 4 (10%)                   |
|                               | Unknown               | 7 (8%)                       | 4 (10%)                   |
| <b>Palliative sedation</b>    |                       | 41 (51%)                     | 12 (31%)                  |

Data are presented as number (% of total) or as number (% of death)

**eFigure 4.** Cox Proportional Hazard Survival Curve

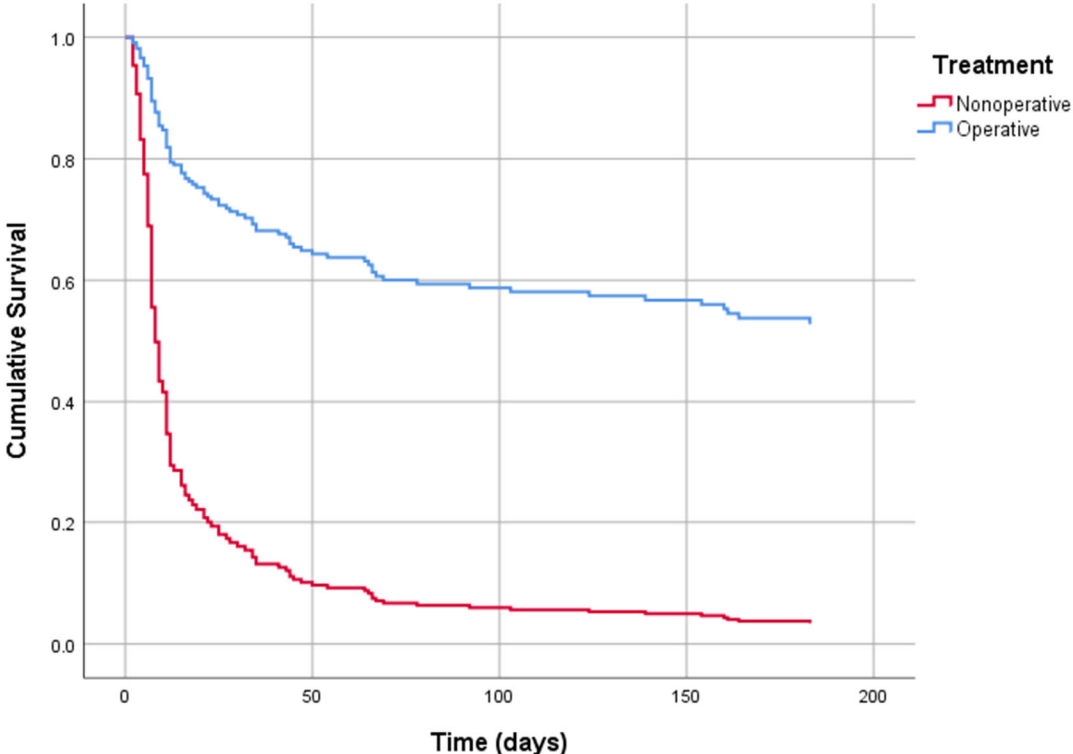

Multivariable analysis of the survival over time in days with the Cox proportional hazard survival curve of patients treated nonoperatively and operatively adjusted for age, sex and ASA-classification.

**eTable 12.** Multivariable Analysis of Survival Risk

| Characteristic               | B      | SE    | Wald   | df | Sig.  | Exp(B) | 95% CI for Exp(B) |       |
|------------------------------|--------|-------|--------|----|-------|--------|-------------------|-------|
|                              |        |       |        |    |       |        | Lower             | Upper |
| <b>Treatment</b> (operative) | -1.666 | 0.202 | 68.260 | 1  | <.001 | 0.189  | 0.127             | 0.281 |
| <b>Sex</b> (female)          | -.427  | 0.216 | 3.911  | 1  | .05   | 0.653  | 0.427             | 0.996 |
| <b>Age</b> (years)           | 0.022  | 0.014 | 2.392  | 1  | .12   | 1.022  | 0.994             | 1.052 |
| <b>ASA classification</b>    | -.076  | 0.174 | 0.189  | 1  | .66   | 0.927  | 0.659             | 1.304 |

ASA, American Society of Anesthesiologists

**eTable 13.** Treatment Satisfaction and Quality of Dying and Death

| Treatment satisfaction (NRS) |                          | N  | NOM<br>(N=84) | N  | OM<br>(N=84) | P-value |
|------------------------------|--------------------------|----|---------------|----|--------------|---------|
| <b>Proxy</b>                 | Completed FU             | 5  | 8 (4-9)       | 41 | 8 (8-9)      | .23     |
|                              | Death prior to end of FU | 79 | 8 (8-9)       | 39 | 8 (7-8)      | .001    |
| <b>Healthcare provider</b>   | Completed FU             | 5  | 8 (4-9)       | 37 | 8 (7-9)      | .48     |
|                              | Death prior to end of FU | 79 | 8 (8-9)       | 36 | 7 (5-8)      | <.001   |
| <b>QODD</b>                  | ‘Terrible-poor’          | 51 | 2 (4%)        | 21 | 0 (0%)       | .34     |
|                              | ‘Intermediate’           |    | 23 (45%)      |    | 13 (62%)     |         |
|                              | ‘Good-almost perfect’    |    | 26 (51%)      |    | 8 (38%)      |         |

Data are presented as median (P25-P75) or as n (%)

NRS, Numeric Rating Scale; NOM, nonoperative management; OM, operative management; FU, Follow-up; QODD, Quality of Dying and Death
