# Supplementary material
Source: PubMed Central journal article supplement (PMC8892372)
Supplement: jamasurg-e220089-s002.pdf [file jamasurg-e220089-s002.pdf]

\*Indicates required information. Only first name, last name, and suffix will appear in PubMed.

| <b>*Group Name(s): FRAIL-HIP study group</b> |                   |                              |                         |                                                 |                                                 |                                                                |                                                                                                   |
|----------------------------------------------|-------------------|------------------------------|-------------------------|-------------------------------------------------|-------------------------------------------------|----------------------------------------------------------------|---------------------------------------------------------------------------------------------------|
| <b>*First Name and Middle Initial(s)</b>     | <b>*Last Name</b> | <b>*Suffix (eg, Jr, III)</b> | <b>Academic Degrees</b> | <b>Institution</b>                              | <b>Location (city, state/province, country)</b> | <b>Role or Contribution, eg, chair, principal investigator</b> | <b>Group (if more than 1 Group listed in the byline) and/or Subgroup (eg, Steering Committee)</b> |
| Lisanne                                      | Balemans          |                              | MD                      | Flevoziekenhuis                                 | Almere                                          | Collaborator                                                   |                                                                                                   |
| Frank W.                                     | Bloemers          |                              | MD PhD                  | Amsterdam UMC                                   | Amsterdam                                       | Collaborator                                                   |                                                                                                   |
| Janneke                                      | Bos               |                              | MD                      | Catharina Ziekenhuis                            | Eindhoven                                       | Collaborator                                                   |                                                                                                   |
| Bart J.                                      | Burger            |                              | MD PhD                  | Noordwest Ziekenhuisgroep                       | Alkmaar                                         | Collaborator                                                   |                                                                                                   |
| Judella O                                    | Daal              |                              | MD                      | Dijklander Ziekenhuis                           | Hoorn                                           | Collaborator                                                   |                                                                                                   |
| Annemarieke                                  | De Jonghe         |                              | MD PhD                  | Tergooi                                         | Hilversum                                       | Collaborator                                                   |                                                                                                   |
| Matthea                                      | Dijkshoorn        |                              | MD                      | Ziekenhuis Tjongerschans                        | Heerenveen                                      | Collaborator                                                   |                                                                                                   |
| Michael J.R.                                 | Edwards           |                              | MD PhD                  | Radboud UMC                                     | Nijmegen                                        | Collaborator                                                   |                                                                                                   |
| Ellen A.                                     | Elbrecht          |                              | MD                      | Deventer Ziekenhuis                             | Deventer                                        | Collaborator                                                   |                                                                                                   |
| Miriam C.                                    | Faes              |                              | MD PhD                  | Amphia Ziekenhuis                               | Breda                                           | Collaborator                                                   |                                                                                                   |
| Elvira R.                                    | Flikweert         |                              | MD                      | Deventer Ziekenhuis                             | Deventer                                        | Collaborator                                                   |                                                                                                   |
| Ellis C.                                     | Folbert           |                              | MD PhD                  | Ziekenhuisgroep Twente                          | Almelo                                          | Collaborator                                                   |                                                                                                   |
| Robert D.A.                                  | Gaasbeek          |                              | MD PhD                  | Meander MC                                      | Amersfoort                                      | Collaborator                                                   |                                                                                                   |
| Olivia C.                                    | Geraghty          |                              | MD PhD                  | St. Antonius Ziekenhuis                         | Nieuwegein                                      | Collaborator                                                   |                                                                                                   |
| J. Carel                                     | Goslings          |                              | MD PhD                  | OLVG Hospital                                   | Amsterdam                                       | Collaborator                                                   |                                                                                                   |
| Johannes H.                                  | Hegeman           |                              | MD PhD                  | Ziekenhuisgroep Twente                          | Almelo                                          | Collaborator                                                   |                                                                                                   |
| Mischa M.                                    | Hindriks          |                              | MD                      | Bernhoven                                       | Uden                                            | Collaborator                                                   |                                                                                                   |
| Micha                                        | Holla             |                              | MD PhD                  | Radboud UMC                                     | Nijmegen                                        | Collaborator                                                   |                                                                                                   |
| André                                        | Janse             |                              | MD                      | Ziekenhuis Gelderse Vallei                      | Ede                                             | Collaborator                                                   |                                                                                                   |
| Joris A.                                     | Jansen            |                              | MD                      | Alrijne Ziekenhuis                              | Leiderdorp                                      | Collaborator                                                   |                                                                                                   |
| Simone J.M.                                  | Jong              |                              | MD                      | OLVG Hospital                                   | Amsterdam                                       | Collaborator                                                   |                                                                                                   |
| Paul J.C.                                    | Kapitein          |                              | MD                      | Ziekenhuis Gelderse Vallei                      | Ede                                             | Collaborator                                                   |                                                                                                   |
| Ydo V.                                       | Kleinlugtenbelt   |                              | MD PhD                  | Deventer Ziekenhuis                             | Deventer                                        | Collaborator                                                   |                                                                                                   |
| Barbara E.                                   | Kreis             |                              | MD                      | Streekziekenhuis Koningin Beatrix               | Winterswijk                                     | Collaborator                                                   |                                                                                                   |
| Rover                                        | Krips             |                              | MD PhD                  | Flevoziekenhuis                                 | Almere                                          | Collaborator                                                   |                                                                                                   |
| Koen W.W.                                    | Lansink           |                              | MD PhD                  | Elisabeth-TweeSteden Ziekenhuis                 | Tilburg                                         | Collaborator                                                   |                                                                                                   |
| Michiel                                      | Leijnen           |                              | MD                      | Alrijne Ziekenhuis                              | Leiderdorp                                      | Collaborator                                                   |                                                                                                   |
| Pieter H.W.                                  | Lubbert           |                              | MD PhD                  | Ziekenhuis Tjongerschans                        | Heerenveen                                      | Collaborator                                                   |                                                                                                   |
| Francesco U.S.                               | Mattace-Raso      |                              | MD PhD                  | Erasmus MC, University Medical Center Rotterdam | Rotterdam                                       | Collaborator                                                   |                                                                                                   |
| Marieke C.                                   | Meinardi          |                              | MD                      | Albert Schweitzer Ziekenhuis                    | Dordrecht                                       | Collaborator                                                   |                                                                                                   |
| Joris J.                                     | Mellema           |                              | MD                      | Ziekenhuis Tjongerschans                        | Heerenveen                                      | Collaborator                                                   |                                                                                                   |
| Roland M.H.G.                                | Mollen            |                              | MD PhD                  | Ziekenhuis Gelderse Vallei                      | Ede                                             | Collaborator                                                   |                                                                                                   |
| Majon                                        | Muller            |                              | MD PhD                  | Amsterdam UMC                                   | Amsterdam                                       | Collaborator                                                   |                                                                                                   |
| Joost C.                                     | Peerbooms         |                              | MD                      | Albert Schweitzer Ziekenhuis                    | Dordrecht                                       | Collaborator                                                   |                                                                                                   |

## Supplemental Online Content: Nonauthor Collaborators

\*Indicates required information. Only first name, last name, and suffix will appear in PubMed.

| *First Name and Middle Initial(s) | *Last Name     | *Suffix (eg, Jr, III) | Academic Degrees | Institution                     | Location (city, state/province, country) | Role or Contribution, eg, chair, principal investigator | Group (if more than 1 Group listed in the byline) and/or Subgroup (eg, Steering Committee) |
|-----------------------------------|----------------|-----------------------|------------------|---------------------------------|------------------------------------------|---------------------------------------------------------|--------------------------------------------------------------------------------------------|
| Rudolf W.                         | Poolman        |                       | MD PhD           | OLVG Hospital                   | Amsterdam                                | Collaborator                                            |                                                                                            |
| Miruna                            | Popescu        |                       | MD PhD           | Noordwest Ziekenhuisgroep       | Alkmaar                                  | Collaborator                                            |                                                                                            |
| Albert F.                         | Pull ter Gunne |                       | MD PhD           | Rijnstate                       | Arnhem                                   | Collaborator                                            |                                                                                            |
| Bas J.                            | Punt           |                       | MD               | Albert Schweitzer Ziekenhuis    | Dordrecht                                | Collaborator                                            |                                                                                            |
| Gert R.                           | Roukema        |                       | MD               | Maastad Ziekenhuis              | Rotterdam                                | Collaborator                                            |                                                                                            |
| Hilde I.F.                        | Roijen         |                       | MD               | Isala                           | Zwolle                                   | Collaborator                                            |                                                                                            |
| Jeanine                           | Schukking      |                       | MD               | Rode Kruis Ziekenhuis           | Beverwijk                                | Collaborator                                            |                                                                                            |
| Josje                             | Snoek          |                       | MD               | Bernhoven                       | Uden                                     | Collaborator                                            |                                                                                            |
| Charles T.                        | Stevens        |                       | MD               | Bernhoven                       | Uden                                     | Collaborator                                            |                                                                                            |
| Dieneke                           | van Asselt     |                       | MD PhD           | Radboud UMC                     | Nijmegen                                 | Collaborator                                            |                                                                                            |
| Esther                            | Van de Glind   |                       | MD PhD           | Alrijne Ziekenhuis              | Leiderdorp                               | Collaborator                                            |                                                                                            |
| Alexander H.                      | Van der Veen   |                       | MD PhD           | Catharina Ziekenhuis            | Eindhoven                                | Collaborator                                            |                                                                                            |
| Detlef                            | Van der Velde  |                       | MD PhD           | St. Antonius Ziekenhuis         | Nieuwegein                               | Collaborator                                            |                                                                                            |
| Bart A                            | Van Dijkman    |                       | MD               | Flevoziekenhuis                 | Almere                                   | Collaborator                                            |                                                                                            |
| Sven H.                           | Van Helden     |                       | MD PhD           | Isala                           | Zwolle                                   | Collaborator                                            |                                                                                            |
| Paul J.                           | Van Koperen    |                       | MD PhD           | Meander MC                      | Amersfoort                               | Collaborator                                            |                                                                                            |
| Job L.C.                          | Van Susante    |                       | MD               | Rijnstate                       | Arnhem                                   | Collaborator                                            |                                                                                            |
| Romuald                           | Van Velde      |                       | MD               | Tergooi                         | Hilversum                                | Collaborator                                            |                                                                                            |
| M. Rammelt                        | Veen           |                       | MD PhD           | St. Antonius Ziekenhuis         | Nieuwegein                               | Collaborator                                            |                                                                                            |
| Ralf W.                           | Vingerhoets    |                       | MD               | Elisabeth-TweeSteden Ziekenhuis | Tilburg                                  | Collaborator                                            |                                                                                            |
| Dagmar I.                         | Vos            |                       | MD PhD           | Amphia Ziekenhuis               | Breda                                    | Collaborator                                            |                                                                                            |
| Hugo H.                           | Wijnen         |                       | MD               | Rijnstate                       | Arnhem                                   | Collaborator                                            |                                                                                            |
| Judith                            | Wilmer         |                       | MD               | Catharina Ziekenhuis            | Eindhoven                                | Collaborator                                            |                                                                                            |
| Jasper                            | Winkelhagen    |                       | MD               | Dijklander Ziekenhuis           | Hoorn                                    | Collaborator                                            |                                                                                            |
| Johan F.H.                        | Wold           |                       | MD               | Meander MC                      | Amersfoort                               | Collaborator                                            |                                                                                            |
| Robbert A.                        | Zandbergen     |                       | MD               | Rode Kruis Ziekenhuis           | Beverwijk                                | Collaborator                                            |                                                                                            |
| G. (Bert)                         | Ziere          |                       | MD PhD           | Maastad Ziekenhuis              | Rotterdam                                | Collaborator                                            |                                                                                            |
